# Supplementary material for: Phishing suspiciousness in older and younger adults: The role of executive functioning
Source: PubMed Central journal article supplement (PMC5291531; doi:10.1371/journal.pone.0171620), 2017-02-03
Supplement: pone.0171620.s001.pdf [file pone.0171620.s001.pdf]

Participant ID: \_\_\_\_\_ Date: \_\_\_\_\_ Examiner: \_\_\_\_\_

Please answer the following questions about your experience with the web browsing activities:

1. Had you heard of “Web Single Sign-On” before coming in today?

Yes            No

2. Did you notice anything suspicious about the websites that you visited during this study?

Yes            No

Please explain your answer to this question from the following perspectives:

(1) Website look and feel:

---

(2) Website URL address:

---

(3) Website identity certificate:

---

(4) Other (please specify):

---

3. If you signed into any of the websites during this study, did you use your correct username and password?

Yes            No

4. Being that you are in a laboratory environment, would you have reacted differently to any of the websites on your computer at home?

Yes            No

5. What makes a website seem “trustworthy” to you? (circle all that apply)

Website look and feel

Website URL address

Website identity certificate

Other (please specify): \_\_\_\_\_

6. Are you aware of phishing attacks?

Yes

No

7. Have you been susceptible to any phishing attacks in the past?

Yes

No

8. Do you prefer to create a dedicated account for a website to sign into it or do you prefer to sign into the website using your Google, Facebook, or Yahoo account?

a. Creating and using a dedicated account

b. Using my Google, Facebook, or Yahoo account

Please explain your answer to this question:

---

---

---

9. Security is a concern when I perform web browsing activities.

a. Strongly Disagree

b. Slightly Disagree

c. Neutral

d. Slightly Agree

e. Strongly Agree

Please explain your answer to this question:

---

---

---

10. What security measures, if any, do you use to protect yourself from online identity fraud when using the Internet on your own computer?

---

---

---

11. If you have any comments or questions about this study, please write them down:

---

---

---

**Thank you for taking part in this study. Your time is greatly appreciated.**
